# Supplementary material for: Undoped ZnO electrodes for low-cost indoor organic photovoltaics
Source: Royal Society of Chemistry journal article supplement (doi:10.1039/c8ta08432g), 2018-01-01
Supplement: c8ta08432g1.pdf [file c8ta08432g1.pdf]

## Supplementary information

### Un-doped ZnO electrodes for low-cost indoor organic photovoltaics

Ji Soo Goo<sup>1</sup>, Jung Hun Lee<sup>2</sup>, Sang-Chul Shin<sup>1</sup>, Jin-Seong Park<sup>2\*</sup>, and Jae Won Shim<sup>1\*</sup>

<sup>1</sup>Research Center for Photoenergy Harvesting & Conversion Technology (*phct*), Division of Electronics and Electrical Engineering, Dongguk University, Seoul 04620, Korea

<sup>2</sup>Division of Materials Science and Engineering, Hanyang University, Seoul 04763, Korea

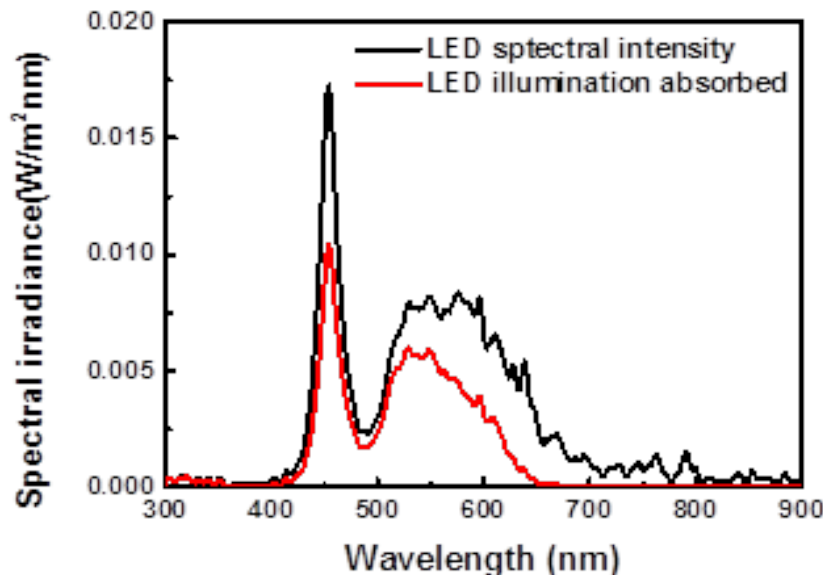

**Figure S1** Spectrum matching between emission of LED lamp and absorption of P3HT:ICBA photoactive layer.

\* Corresponding author. Tel.: 82-2-2220-0401 fax: 82-2-2220-0299.  
Email address: [jsparklime@hanyang.ac.kr](mailto:jsparklime@hanyang.ac.kr) (J.-S. Park).

\* Corresponding author. Tel.: 82-2-2260-3347 fax: 82-2-2277-8735.  
Email address: [jwshim@dongguk.edu](mailto:jwshim@dongguk.edu) (J.W. Shim).

|            | <b>Under 1-sun<br/>(mA/cm<sup>2</sup>)</b> | <b>Under LED 500 lux<br/>(μA/cm<sup>2</sup>)</b> |
|------------|--------------------------------------------|--------------------------------------------------|
| ITO 200 nm | 11.1698                                    | 40.3564                                          |
| ZnO 50 nm  | 11.1931                                    | 41.8775                                          |
| ZnO 100 nm | 10.058                                     | 34.2706                                          |
| ZnO 200 nm | 10.2307                                    | 38.9176                                          |

**Table S1** Calculated maximum obtainable short-circuit current densities under 1-sun and LED lamp with luminance of 500 lux
